# Supplementary material for: Tunicamycin induced endoplasmic reticulum changes in endothelial cells investigated in vitro by confocal Raman imaging
Source: Royal Society of Chemistry journal article supplement (doi:10.1039/c9an01456j), 2019-01-01
Supplement: c9an01456j3.pdf [file c9an01456j3.pdf]

Supplementary Material

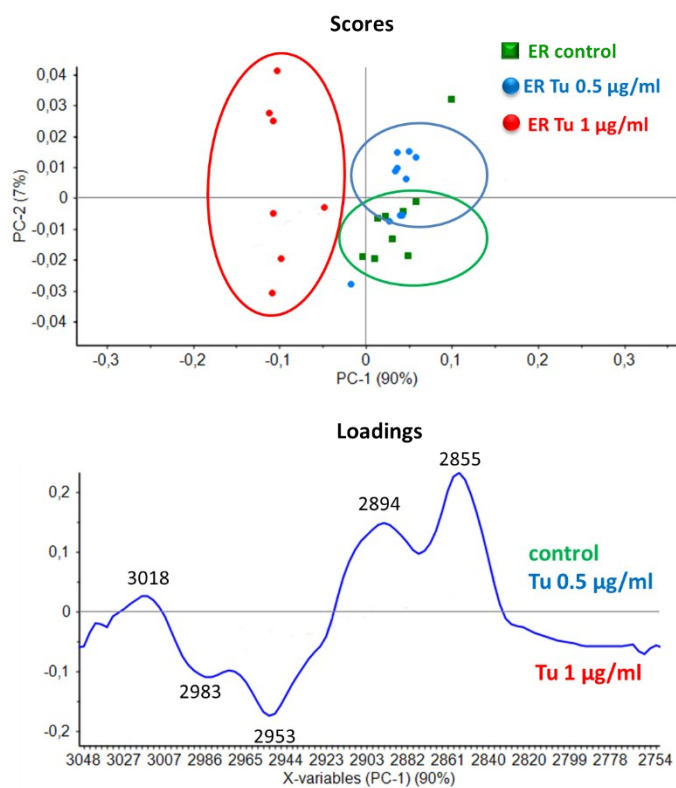

Figure S 1 Principal Component Analysis of Raman spectra of the ER class extracted from control (green) and 0.5 µM (blue) and 1 µg/mL of Tu (red) -stimulated HAoECs.
